## Erratum

Lawrence, F. J., McStay, B. and Matthews, D. A. (2006). Nucleolar protein upstream binding factor is sequestered into adenovirus DNA replication centres during infection without affecting RNA polymerase I location or ablating rRNA synthesis. *J. Cell Sci.* **119**, 2621-2631.

In the print and the online versions of this article the following two references had not been added to the list of references:

Castiglia, C. L. and Flint, S. J. (1983). Effects of adenovirus infection on rRNA synthesis and maturation in HeLa cells. *Mol. Cell Biol.* **3**, 662-671.

and

Stracker, T. H., Carson, C. T. and Weitzman, M. D. (2002). Adenovirus oncoproteins inactivate the Mre11-Rad50-NBS1 DNA repair complex. *Nature* **418**, 348-352.

Also, in the PDF version, the size markers were missing from Fig. 4. The correct figure is shown below.

We apologise for the mistakes.

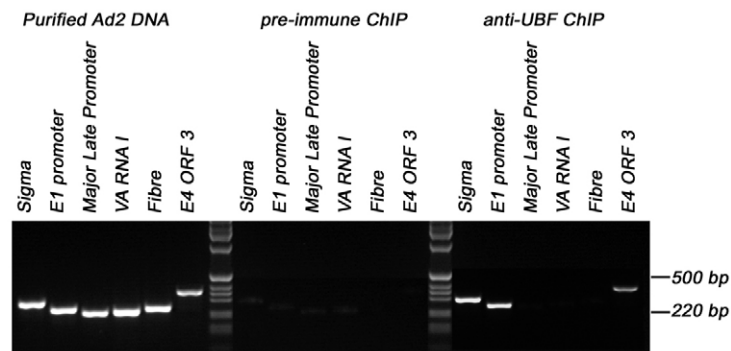

Source: https://cob.silverchair.com/jcs/article-pdf/119/14/3020/1513544/3020.pdf
